# Supplementary material for: Dietary supplementation with Bacillus subtilis and xylo-oligosaccharides improves growth performance and intestinal morphology and alters intestinal microbiota and metabolites in weaned piglets
Source: Royal Society of Chemistry journal article supplement (doi:10.1039/d1fo00208b), 2021-01-01
Supplement: d1fo00208b1.pdf [file d1fo00208b1.pdf]

**Table S1** Effects of dietary BS and XOS supplementation on mean count of clean sequences and OTUs of weaned piglets

| Sample Name | Ileum               |      | Sample Name | Colon               |      |
|-------------|---------------------|------|-------------|---------------------|------|
|             | Effective sequences | OTUs |             | Effective sequences | OTUs |
| IBD1        | 31701               | 335  | CBD1        | 38218               | 782  |
| IBD2        | 37638               | 271  | CBD2        | 38047               | 1229 |
| IBD3        | 34771               | 300  | CBD3        | 34257               | 1032 |
| IBD4        | 35871               | 598  | CBD4        | 27067               | 1011 |
| IBD5        | 36151               | 241  | CBD5        | 38300               | 1336 |
| IBD6        | 32264               | 384  | CBD6        | 27436               | 822  |
| IBD7        | 29337               | 379  | CBD7        | 29425               | 971  |
| IBD8        | 34976               | 491  | CBD8        | 32641               | 1101 |
| IBS1        | 32718               | 282  | CBS1        | 27687               | 647  |
| IBS2        | 30725               | 395  | CBS2        | 34589               | 1100 |
| IBS3        | 29749               | 481  | CBS3        | 31761               | 1072 |
| IBS4        | 32021               | 450  | CBS4        | 27699               | 1078 |
| IBS5        | 31148               | 517  | CBS5        | 31901               | 1161 |
| IBS6        | 38376               | 448  | CBS6        | 30570               | 1009 |
| IBS7        | 34462               | 401  | CBS7        | 27530               | 1024 |
| IBS8        | 33757               | 407  | CBS8        | 27647               | 1098 |
| IXOS1       | 32965               | 446  | CXOS1       | 27931               | 1065 |
| IXOS2       | 35070               | 607  | CXOS2       | 35561               | 788  |
| IXOS3       | 33601               | 354  | CXOS3       | 41429               | 1223 |
| IXOS4       | 28874               | 514  | CXOS4       | 28071               | 1144 |
| IXOS5       | 35628               | 567  | CXOS5       | 29310               | 1081 |
| IXOS6       | 29182               | 227  | CXOS6       | 29275               | 886  |
| IXOS7       | 32183               | 518  | CXOS7       | 29010               | 1013 |
| IXOS8       | 32108               | 388  | CXOS8       | 35689               | 1045 |

---

|         |       |     |         |       |      |
|---------|-------|-----|---------|-------|------|
| IBSXOS1 | 31469 | 423 | CBSXOS1 | 31951 | 994  |
| IBSXOS2 | 29816 | 458 | CBSXOS2 | 27042 | 950  |
| IBSXOS3 | 33395 | 546 | CBSXOS3 | 32387 | 1371 |
| IBSXOS4 | 28099 | 276 | CBSXOS4 | 31700 | 884  |
| IBSXOS5 | 31260 | 461 | CBSXOS5 | 36858 | 1073 |
| IBSXOS6 | 29402 | 325 | CBSXOS6 | 33288 | 1191 |
| IBSXOS7 | 27465 | 262 | CBSXOS7 | 29891 | 958  |
| IBSXOS8 | 27795 | 241 | CBSXOS8 | 27974 | 1107 |

---

Data are expressed as means with pooled SEM ( $n = 8$ ).

**Table S2** Effects of dietary BS and XOS supplementation on metabolic pathway in the ileum and colon of weaned piglets

| Items | -XOS  |       | +XOS  |       | SEM    | <i>P</i> -values |      |        |
|-------|-------|-------|-------|-------|--------|------------------|------|--------|
|       | -BS   | +BS   | -BS   | +BS   |        | BS               | XOS  | BS×XOS |
| Ileum |       |       |       |       |        |                  |      |        |
| AAM   | 0.078 | 0.078 | 0.078 | 0.073 | 0.002  | 0.52             | 0.62 | 0.53   |
| BOSM  | 0.007 | 0.007 | 0.006 | 0.006 | <0.001 | 0.86             | 0.48 | 0.83   |
| CM    | 0.118 | 0.113 | 0.111 | 0.116 | 0.001  | 0.91             | 0.32 | 0.03   |
| EM    | 0.047 | 0.049 | 0.049 | 0.048 | <0.001 | 0.62             | 0.24 | 0.04   |
| EF    | 0.022 | 0.022 | 0.022 | 0.022 | <0.001 | 0.61             | 0.51 | 0.93   |
| GBM   | 0.021 | 0.020 | 0.020 | 0.020 | <0.001 | 0.93             | 0.42 | 0.44   |
| LM    | 0.027 | 0.029 | 0.029 | 0.027 | <0.001 | 0.10             | 0.94 | 0.04   |
| MCV   | 0.030 | 0.032 | 0.033 | 0.030 | <0.001 | 0.41             | 0.59 | 0.03   |
| MOAA  | 0.015 | 0.016 | 0.016 | 0.015 | <0.001 | 0.69             | 0.78 | 0.02   |
| MTP   | 0.017 | 0.017 | 0.018 | 0.017 | <0.001 | 0.80             | 0.52 | 0.07   |
| NM    | 0.050 | 0.047 | 0.049 | 0.049 | 0.001  | 0.36             | 0.67 | 0.14   |
| XBM   | 0.020 | 0.022 | 0.022 | 0.020 | 0.001  | 0.61             | 0.76 | 0.09   |
| Colon |       |       |       |       |        |                  |      |        |
| AAM   | 0.096 | 0.095 | 0.096 | 0.096 | <0.001 | 0.64             | 0.29 | 0.56   |
| BOSM  | 0.010 | 0.010 | 0.010 | 0.009 | <0.001 | 0.35             | 0.31 | 0.32   |
| CM    | 0.102 | 0.104 | 0.104 | 0.104 | <0.001 | 0.62             | 0.21 | 0.18   |
| EM    | 0.057 | 0.055 | 0.057 | 0.057 | <0.001 | 0.12             | 0.13 | 0.08   |
| EF    | 0.022 | 0.022 | 0.022 | 0.022 | <0.001 | 0.77             | 0.30 | 0.50   |
| GBM   | 0.018 | 0.018 | 0.019 | 0.019 | <0.001 | 0.93             | 0.40 | 0.91   |
| LM    | 0.028 | 0.028 | 0.028 | 0.028 | <0.001 | 0.63             | 0.75 | 0.64   |
| MCV   | 0.043 | 0.042 | 0.043 | 0.043 | <0.001 | 0.38             | 0.86 | 0.20   |
| MOAA  | 0.014 | 0.014 | 0.015 | 0.014 | <0.001 | 0.65             | 0.40 | 0.37   |
| MTP   | 0.015 | 0.015 | 0.015 | 0.016 | <0.001 | 0.88             | 0.04 | 0.34   |

|     |       |       |       |       |        |      |      |      |
|-----|-------|-------|-------|-------|--------|------|------|------|
| NM  | 0.039 | 0.039 | 0.039 | 0.040 | <0.001 | 0.71 | 0.29 | 0.85 |
| XBM | 0.014 | 0.014 | 0.014 | 0.015 | 0.002  | 0.30 | 0.11 | 0.59 |

---

Data are expressed as means with pooled SEM ( $n = 8$ ). AAM, Amino Acid Metabolism; BOSM, Biosynthesis of Other Secondary Metabolites; CM, Carbohydrate Metabolism; EM1, Energy Metabolism; EF, Enzyme Families; GBM, Glycan Biosynthesis and Metabolism; LM, Lipid Metabolism; MCV, Metabolism of Cofactors and Vitamins; MOAA, Metabolism of Other Amino Acids; MTP, Metabolism of Terpenoids and Polyketides; NM, Nucleotide Metabolism; XBM, Xenobiotics Biodegradation and Metabolism; CM, Carbohydrate Metabolism; EM, Energy Metabolism; BS, *Bacillus subtilis*; XOS, xylo-oligosaccharides.

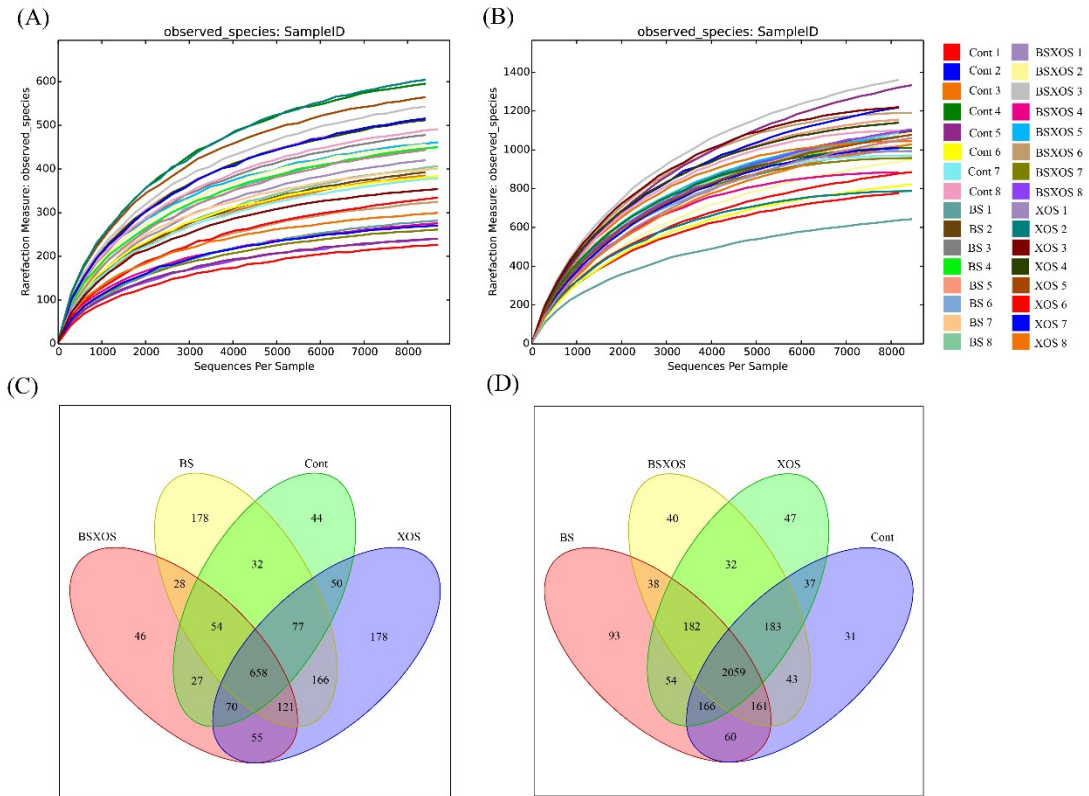

**Fig. S1.** The rarefaction curves were drawn in the ileum (A) and colon (B), respectively. Venn pictures showed the shared and unique OTUs in the ileum (C) and colon (D) of the four treatment groups, respectively.

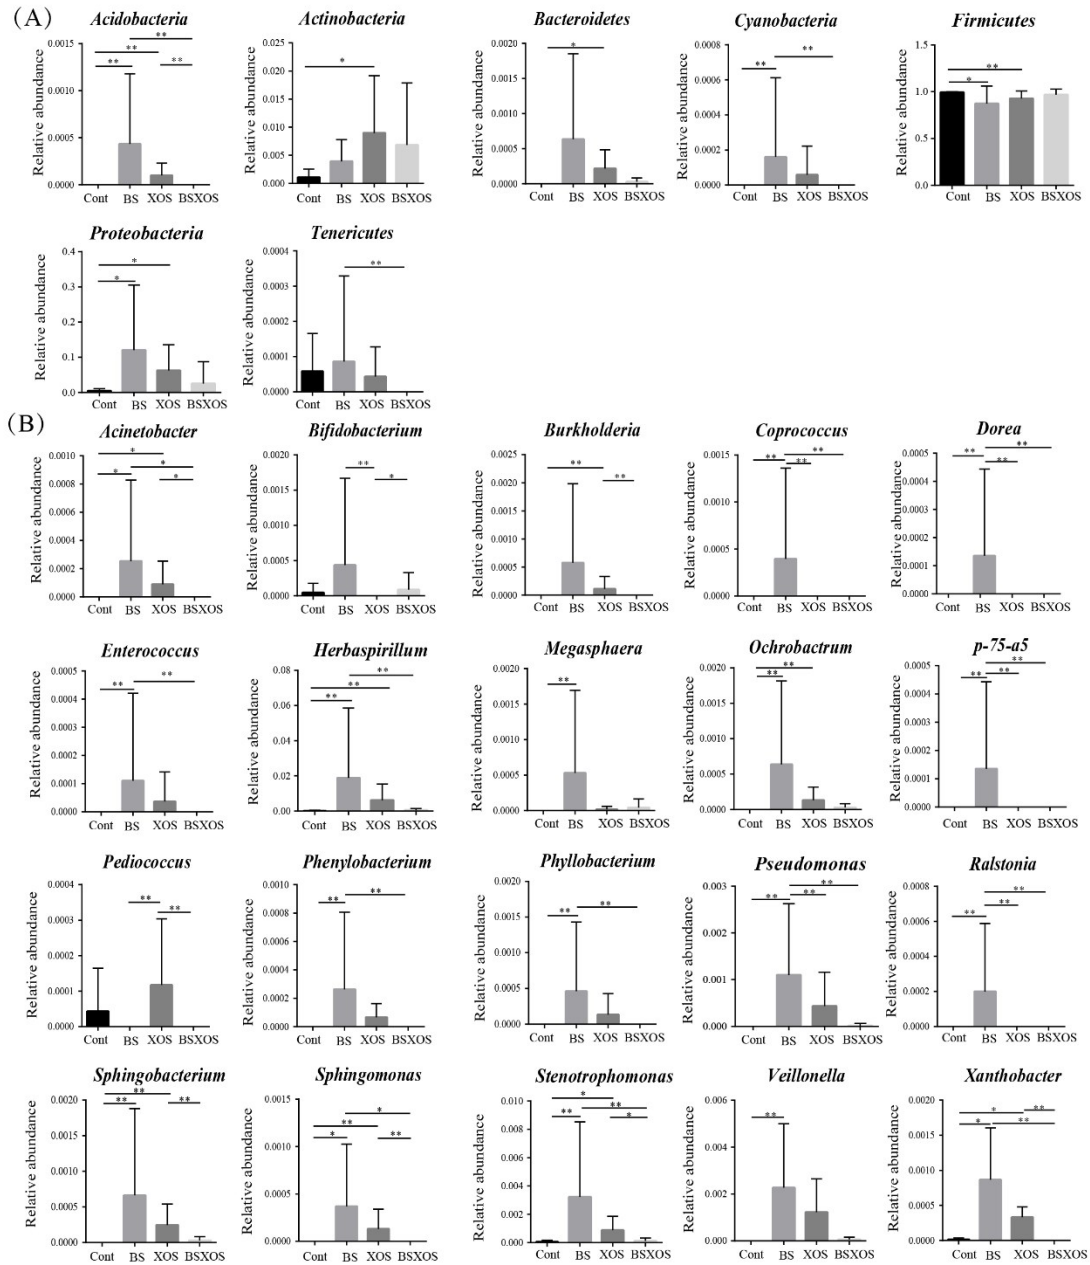

**Fig. S2.** Taxonomic differences in piglets' intestinal microbiota at the phylum level (A) and the genera level (B) in ileum of weaned piglets ( $n = 8$ ). Values are expressed as means with their SD indicated by vertical bars. \*  $P < 0.05$ , \*\*  $P < 0.01$ . Discrepant bacteria at the phylum level were all listed and only the top 20 were listed on the genera level. Cont, piglets received a basal diet; BS, piglets received a basal diet with  $500 \text{ g t}^{-1}$  BS; XOS, piglets received a basal diet with  $250 \text{ g t}^{-1}$  XOS; and BS+XOS, piglets received a basal diet with  $500 \text{ g t}^{-1}$  BS and  $250 \text{ g t}^{-1}$  XOS.

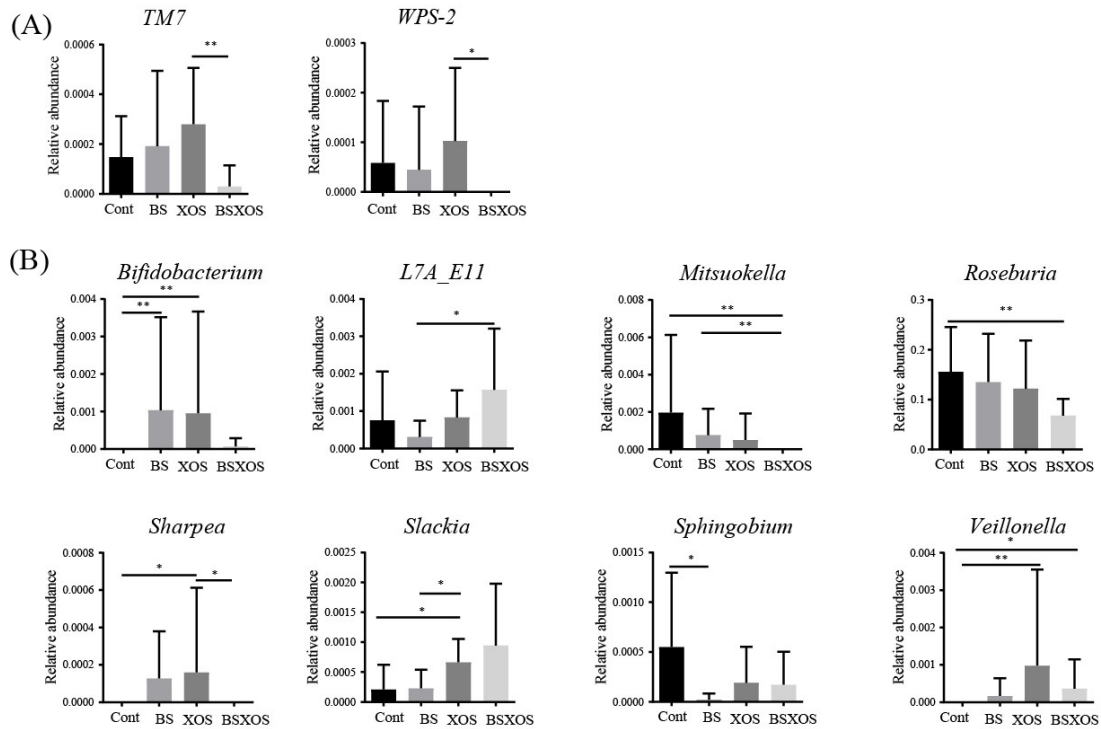

**Fig. S3.** Taxonomic differences in piglets' intestinal microbiota at the phylum level (A) and the genera level (B) in colon of weaned piglets (n = 8). Values are expressed as means with their SD indicated by vertical bars. \*  $P < 0.05$ , \*\*  $P < 0.01$ . Discrepant bacteria at phylum level and the genera level were all listed. Cont, piglets received a basal diet; BS, piglets received a basal diet with 500 g t<sup>-1</sup> BS; XOS, piglets received a basal diet with 250 g t<sup>-1</sup> XOS; and BS+XOS, piglets received a basal diet with 500 g t<sup>-1</sup> BS and 250 g t<sup>-1</sup> XOS.
